# Supplementary material for: Multimode stimulated luminescence of LiNbO 3 :Pr 3+ /ZnS:Cu/PDMS flexible films
Source: Royal Society of Chemistry journal article supplement (doi:10.1039/d4tc03945a), 2024-10-22
Supplement: d4tc03945a1.pdf [file d4tc03945a1.pdf]

## Supplementary materials

### Multimode Stimulated Luminescence of $\text{LiNbO}_3:\text{Pr}^{3+}/\text{ZnS}:\text{Cu}/\text{PDMS}$ flexible films

Lidong Wang, Xueting Fu, Hai Jiang, Peng Du, Laihui Luo\*

Department of Microelectronics Science and Engineering, School of Physical Science  
and Technology, Ningbo University, Ningbo, 315211, China

Corresponding authors: [luolaihui@nbu.edu.cn](mailto:luolaihui@nbu.edu.cn)

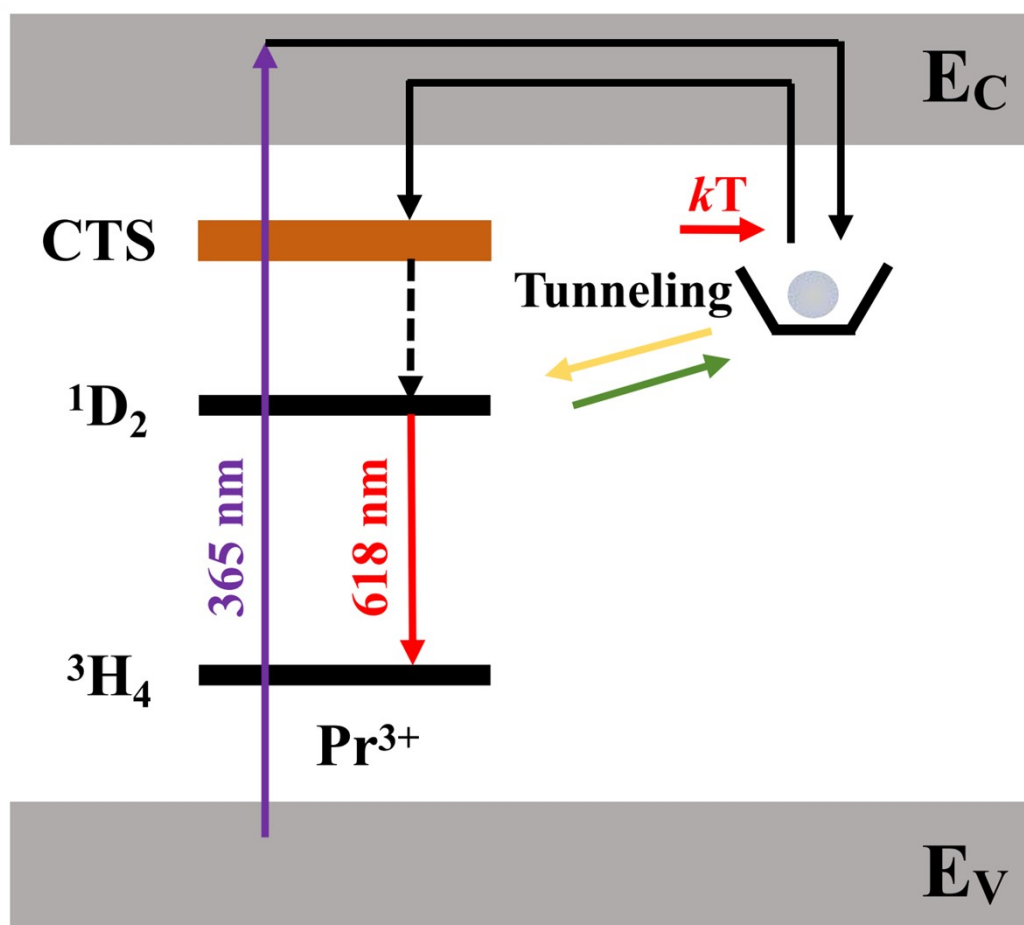

Figure S1. The TL mechanism of  $\text{LiNbO}_3:\text{xPr}^{3+}$ .

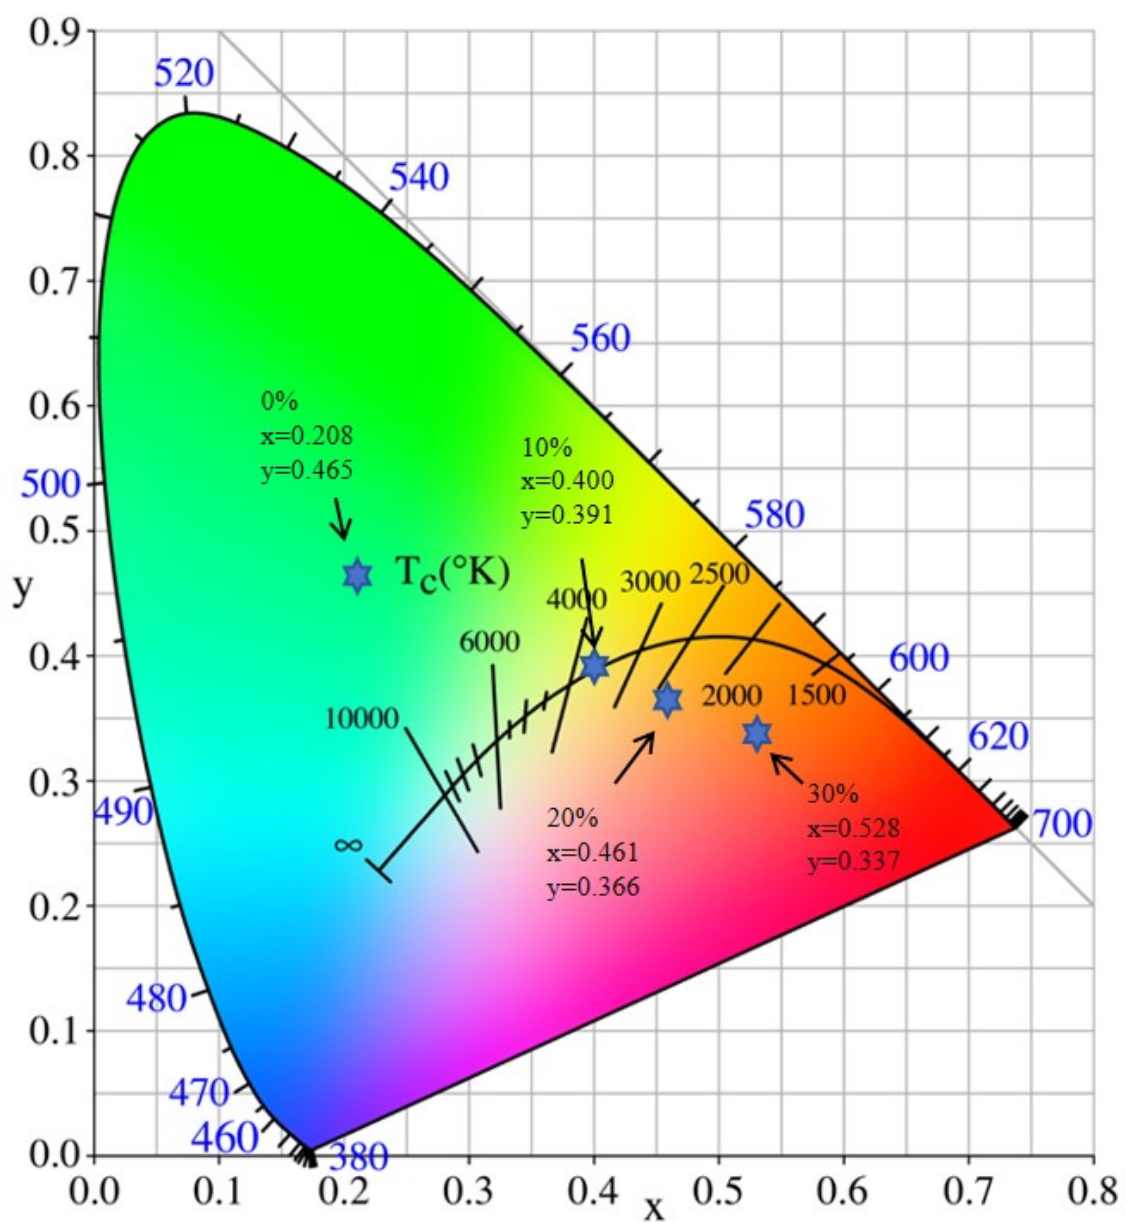

Figure S2. CIE coordinates ( $x$ ,  $y$ ) calculated from the PL spectra.

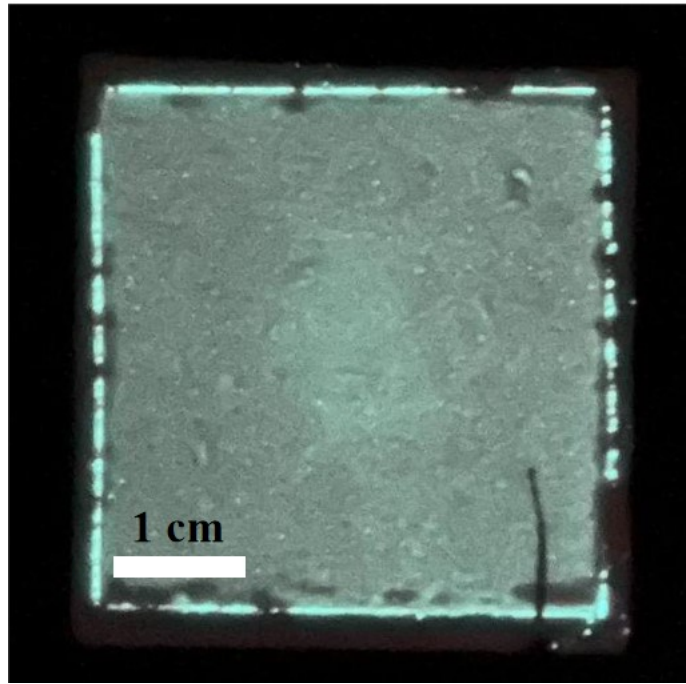

**Figure S3.** Photographic image of EL device under low-frequency voltage

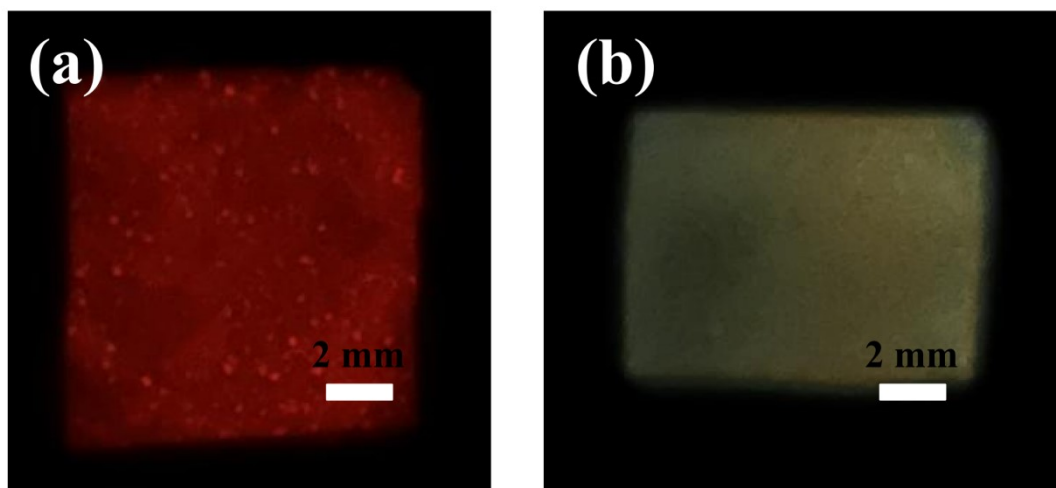

**Figure S4.** (a) TL photograph of the  $\text{LiNbO}_3:0.01\text{Pr}^{3+}/\text{PDMS}$  flexible film. (b) TL photograph of the  $\text{LiNbO}_3:0.01\text{Pr}^{3+}/\text{ZnS:Cu}/\text{PDMS}$  flexible film.
